# Supplementary material
Source: PubMed Central journal article supplement (PMC2638715)
Supplement: pcn168_1.pdf [file pcn168_1.pdf]

## Supplementary Data 1

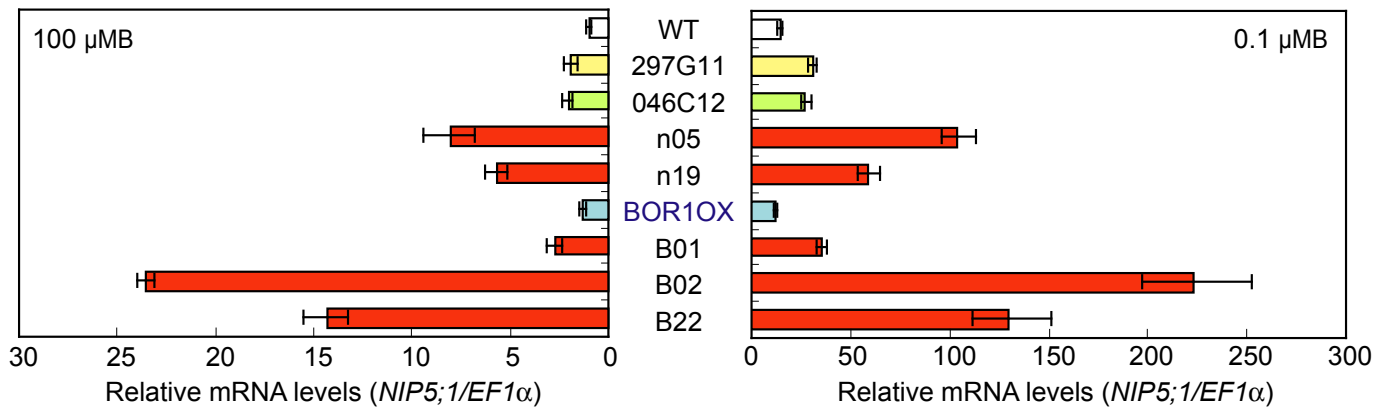

### Supplementary Fig. 1

Relative mRNA levels of *NIP5;1* in roots of the activation tag lines and the transgenic plants under 100 μM and 0.1 μM boric acid supply.

Plants were grown on plates containing 100 μM B for 12 days. Then they were transferred to plates containing 0.1 μM B or 100 μM and incubated for 1 day. Total RNAs were extracted from roots of 7-10 plants. The averages and SDs are presented for independent reverse transcription reactions followed by real-time PCR (n=3). The five transgenic lines were randomly selected and used for this experiment. n05 and n19 carry *Pro35S-NIP5;1-NIP5;1* in the *nip5;1-1* background and, B01, B02, and B22 carry and *Pro35S-NIP5;1-NIP5;1* in BOR1OX background. Relative *NIP5;1* accumulation levels to that of *EF1α* are shown.
